1 **Comparative Analysis of Genetically-Modified Crops: Conditional**  
2 **Equivalence Criteria**

3

4 **Short Title: Conditional Equivalence Criteria for Genetically-Modified Crops**

5

6 Changjian Jiang<sup>1\*</sup>, Chen Meng<sup>1</sup>, Adam W. Schapaugh<sup>1</sup>, Huizhe Jin<sup>1</sup>

7

8 <sup>1</sup> Bayer Crop Science

9 700 Chesterfield Parkway West

10 Chesterfield, Missouri, 63017-1732, USA

11

12

13 \* *Corresponding author*

14

## 15 **Abstract**

16 The comparative assessment of genetically-modified (GM) crops relies on the principle of  
17 substantial equivalence, which states that such products should be compared to conventional  
18 counterparts that have an established history of safe use. In an effort to operationalize this  
19 principle, the GMO Panel of the European Food Safety Authority proposed an equivalence test  
20 that directly compares a GM test variety with a set of unrelated, conventionally-bred reference  
21 varieties with part of the difference as the known background of the test (the same as the given  
22 control). The criterion of the EFSA test, however, is defined solely by genotypic differences  
23 between the non-traited control and reference varieties (i.e. the background effect) while  
24 assuming the so-called GM trait effect as zero. As the outcome of an EFSA equivalence test is  
25 determined primarily by the similarity, or lack thereof, of the control and references, a  
26 conditional equivalence criterion is proposed in this investigation that focuses on “unintended”  
27 effects of a GM trait which is irrespective of the (random) genotypic value of a given control.  
28 The new criterion also includes a mean-scaled standard similar to the 80-125% rule for  
29 bioequivalence assessment practiced in the pharmaceutical industry as an alternative when the  
30 reference variation is zero or close to zero. In addition, optional criteria are proposed with a step-  
31 wise procedure to control the rate of false negatives (non-equivalence by chance) providing a  
32 comprehensive assessment under multiple comparisons. An application to maize grain  
33 composition data demonstrates that the conditional equivalence criterion provides effect-specific  
34 and more robust assessment of equivalence than the EFSA criterion did, especially for GM traits  
35 showing negligible or no unintended effects which are likely true for most traits in the current  
36 market.

## 37 **Introduction**

38       The comparative assessment of foods derived from genetically-modified (GM) crops relies  
39 on the principle of substantial equivalence, which states that such products should be compared  
40 to conventional counterparts that have an established history of safe use but are not required to  
41 have zero difference from a near-isogenic control line absent of a GM trait in terms of “natural  
42 variations” [1-4]. In an effort to operationalize this principle, the GMO Panel of the European  
43 Food Safety Authority (EFSA 2010) proposed an equivalence criterion (thereafter called EFSA  
44 equivalence criterion or limits) that compares a GM test variety with a set of conventionally-bred  
45 references with part of the difference as the known genotypic background of the test (the same as  
46 the near-isogenic control line) [5,6]. Similar criteria have also appeared in the literature [7,8].  
47 Nevertheless, Codex states that “in achieving the objective of conferring a specific target trait  
48 (intended effect) to a plant ..., additional traits ... could be lost or modified (unintended effects)”  
49 and “the safety assessment of foods derived from recombinant-DNA plants involves methods to  
50 identify and detect such unintended effects and procedures to evaluate their biological relevance  
51 and potential impact on food safety” [2]. As described above EFSA’s method requests an  
52 assessment of differences of the test from a set of references regardless of differences from the  
53 control. These differences would contain a trait effect if presents and, however, are certainly  
54 driven by genotypic values of the control resulting from conventional plant breeding (as  
55 described by Jiang et al. [9]). Thus, the result of EFSA equivalence testing in practice often is  
56 unrelated to the trait effect, which should be the sole focus of the comparative assessment,  
57 creating a series of discussions in the recent literature [7-15].

58       As the outcome of an EFSA equivalence test is determined primarily by the similarity, or  
59 lack thereof, of the control and references (Fig 1), a conditional equivalence criterion is proposed

60 in this investigation that focuses on “unintended effects” of a GM trait irrespective of the  
61 (random) genotypic values of a given control.

62

63 **Fig 1. Graphical illustration of EFSA and conditional equivalence criteria.** EFSA

64 equivalence criterion is defined primarily by a (random) control background effect and has no  
65 specification of a GM trait effect, and a conditional equivalence criterion is defined solely for a  
66 GM trait effect with a given control.

67

68 To our knowledge, no equivalence criterion of a GM trait effect (with a given genotypic  
69 background) has been developed for the comparative assessment of GM crops and derived  
70 food/feed. All criteria in the literature are defined on the basis of the background effect assuming  
71 the absence of a GM trait effect [6,7,9] which have shown at least three limitations in practice:  
72 first is the sensitivity of the equivalence conclusion to a given control (i.e., the same GM product  
73 can generate different, completely contradictory, conclusions, based solely on the selected  
74 control) (Fig 1); second is the incomplete coverage of a one-size-fits-all criterion for a wide  
75 range of endpoints, with dramatic differences in their means and variations as explained in the  
76 next section; and third is the lack of a strategy for a control of false negatives (non-equivalence,  
77 in this case) in a comprehensive assessment under multiple comparisons as the criterion defined  
78 by a fixed percentile without an adjustment for the number of comparisons.

79 Here, a conditional equivalence criterion is derived on the basis of an expected mean squared  
80 difference of a GM crop from the references using a mixed model approach assuming the  
81 random background variation, similar to that used by the Food and Drug Administration (FDA)  
82 for individual bioequivalence in the presence of a random, individual-specific effect [16]. When

83 the reference variation for the background effect is too low to provide a valid (variation-scaled)  
84 criterion, a mean-scaled criterion, similar to the 80-125% rule for the bioequivalence assessment  
85 in the pharmaceutical industry, is recommended as an alternative. Due to the alleviated false  
86 negative rate (much higher than the target level of 5% as the EFSA criterion defined by a 95%  
87 confidence interval), a data-driven procedure is proposed for selecting criteria with optional  
88 criteria to statistically control these errors. An application to a maize grain composition example  
89 (used by EFSA) demonstrates that the proposed conditional equivalence criteria provides  
90 substantial improvement for a true similarity measurement of GM crop over three limitations of  
91 EFSA criterion and others.

92 The organization of the manuscript starts with basic assumptions of the principle of  
93 substantial equivalence, followed by the derivation of a set of conditional equivalence criteria,  
94 and then a data-driven procedure for selecting criteria across various endpoints in practice, and  
95 finally an application to a maize grain composition example. The discussion includes additional  
96 thoughts on each of these new criteria, and highlights areas of further research.

97

## 98 **The definition of substantial equivalence**

### 99 **Assumptions and the current practice**

100 Assume a Test-Control-Reference (TCR) trial where the test is the GM variety, the control is  
101 an isogenic non-GM comparator with the genotypic background similar to the test (as monitored  
102 by the molecular breeding technique [17,18]), and the references are comparators with different  
103 genetic backgrounds. Let  $(\mu_T, \mu_C, \mu_R)$  denote parameters of genotypic group means,  $\sigma_g^2$  the

104 genetic variation among references, and ( $\Delta_{TC}$ ,  $\Delta_{CR}$ ,  $\Delta_{TR}$ ) the mean differences among three  
105 groups. For parameters of interest,  $\Delta_{TC}$  represents a GM trait effect with a given control, while  
106  $\Delta_{CR}$  is an effect of the genotypic background shared by the test and the control from the  
107 traditional plant breeding. A simple difference of a GM test from the reference mean  $\Delta_{TR}$  ( $= \Delta_{TC}$   
108  $+ \Delta_{CR}$ ) as expected consists of both GM trait effect  $\Delta_{TC}$  and background effect  $\Delta_{CR}$ .

109 The following are the underlying assumptions of the principle of substantial equivalence and  
110 the current global regulatory approval procedure of a GM crop.

111 (a) GM crop safety assessment is solely interested in the effect of a GM trait regardless of the  
112 genotypic background;

113 “It focuses on assessing the safety of any identified differences so that the safety of the  
114 new product can be considered relative to its conventional counterpart” [2]. Though the  
115 regulatory evaluation of a GM crop is on a given control background, upon approval, the GM  
116 trait could be integrated into any conventional reference (in the current market or from a  
117 breeding program) during the commercial application, and the background effect  $\Delta_{CR}$  is  
118 expected to vary from endpoint to endpoint for a given control or for the same endpoint  
119 across different controls [17,18,19]. An equivalence of a GM crop should focus solely on a  
120 GM trait effect  $\Delta_{TC}$  ( $= \Delta_{TR} - \Delta_{CR}$ ) regardless of the genotypic background effect  $\Delta_{CR}$  of a  
121 given control (Fig 1).

122 (b) Substantial equivalence of a GM crop in statistics is a similarity measure to a distribution of  
123 conventional references with a history-of-safe-use;

124 “Any observed differences should be assessed in the context of the range of natural  
125 variations” [2] demonstrated by conventional references with no requirement of a trait effect

126  $\Delta_{TC} = 0$ . In spite of a given control was applied in a TCR trial, the equivalence of a GM crop  
127 in statistics is a similarity or distance measurement of the mean difference  $\Delta_{TC}$  between two  
128 probability distributions, one for GM crop with various genotypic backgrounds and one for  
129 conventional references, in the scale of the reference variation  $\sigma_g$ .

130 (c) Equivalence conclusion of a GM crop (or a GM trait) relies on the totality of evidence across  
131 key components when compared a given control background.

132 Codex guidelines state [2] that “A variety of data and information are necessary to assess  
133 unintended effects because no individual test can detect all possible unintended effects or  
134 identify, with certainty, those relevant to human health. These data and information, when  
135 considered in total, provide assurance that the food is unlikely to have an adverse effect on  
136 human health”. In practice a comprehensive assessment has been performed over a wide  
137 range of endpoints from various studies e.g. often > 50 analytes in a composition study alone,  
138 and any experimental deviation from equivalence has been evaluated in terms of the “natural  
139 variation” as well as the nominal level of the statistical significance. With such an  
140 assessment, any limitation of the evidence due to a given control is minimized and an  
141 equivalence of a GM trait if concluded could be assumed for different genotypic background  
142 after the commercialization.

143 In summary, by OECD and WHO/FAO guidelines, GM crop safety assessment is  
144 characterized by multiple comparisons of a GM crop across key endpoints with the conventional  
145 references with a given (control) genotypic background. Three features of the assessment, focus  
146 on the GM trait effect, a wide range of background variations, and multiplicity of the  
147 comparisons, are considered in the following section for the derivation of a set of conditional  
148 equivalence criteria.

149

## 150 **A conditional equivalence criterion for similarity**

151 Let  $(D_{TC}, D_{CR}, D_{TR})$  denote estimates of  $(\Delta_{TC}, \Delta_{CR}, \Delta_{TR})$  with variances  $(\sigma_{D_{TC}}^2, \sigma_{D_{CR}}^2, \sigma_{D_{TR}}^2)$ . At  
152 first, equivalence criteria of EFSA [6] and Vahl and Kang [8] from the current literature were  
153 formulated in the notation of this manuscript. Then a conditional equivalence criterion was  
154 derived with a mixed model approach and relationships among three types of criteria were  
155 discussed.

156 EFSA equivalence criterion (or limit) was defined by the following equation under EFSA  
157 model 2, an ad hoc model assuming both test and control in a TCR trial as random and  
158 independent varieties with the same variance as a reference but unspecified means.

$$159 \quad \frac{|D_{TR}|}{\sigma_{D_{TR}}} < \theta_{EFSA} \quad (1)$$

160 where  $D_{TR}$  as stated repeatedly is a mixture of the GM trait effect and the control background  
161 effect,  $\sigma_{D_{TR}}$  consists of both genetic and residual variations (due to sampling), and  $\theta_{EFSA}$  was  
162 specified by a 95% confidence limit of a t distribution with a sample estimate of  $\sigma_{D_{TR}}$  in practice.  
163 Clearly, EFSA equivalence criterion considered only the background variation of the test variety  
164 (shared with the control) and no GM trait effect which, if presented, would have adopted a non-  
165 central t distribution for  $\theta_{EFSA}$ .

166 Vahl and Kang's scaled average equivalence criterion is defined in a similar way but in the  
167 scale of the genetic portion of the background variation [8].

$$168 \quad \frac{|D_{TR}|}{\sigma_g} < \theta_{VK} \quad (2)$$



169 where  $\sigma_g^2$  is the leading term of the genetic variation of  $\sigma_{D_{TR}}^2$  in (1), and  $\theta_{VK}$  was specified by a  
170 95% confidence limit of a standard normal. Nevertheless, underlying assumptions, i.e. the GM  
171 trait effect is zero and the background of a GM test variety being the same as a random  
172 reference, are the same for both criteria (1) and (2).

173 Let  $E_E$  and  $E_C$  denote respective expectation with respect to the environmental effect, such as  
174 site, replicate and residual, and the control background effect following the distribution of  
175 references. A mixed model approach for a fixed effect  $\Delta_{TC}$  and a random effect  $\Delta_{CR}$  assumes  $E_C$   
176  $[E_E(D_{TR})] = E_C[\Delta_{TR}] = E_C[\Delta_{TC} + \Delta_{CR}] = \Delta_{TC}$ , and  $E_C\{[E_E(D_{TR})]^2\} = E_C\{\Delta_{TR}^2\} = \Delta_{TC}^2 + \sigma_g^2$ .  
177 When applying to Vahl and Kang's scaled average equivalence, the following equation can be  
178 derived

$$179 \quad \frac{E_C\{[E_E(D_{TR})]^2\}}{\sigma_g^2} = \frac{\Delta_{TC}^2}{\sigma_g^2} + 1.$$

180 While the first expectation  $E_E(\cdot)$  indicates the test statistic and the parameter of interest the  
181 same as for criteria (1) and (2), the second expectation  $E_C(\cdot)$  reveals the change of hypothesis if  
182 a control background were assumed as random. Clearly,  $\Delta_{TR}$  is for an equivalence with the given  
183 control background as one part of the assessment, and  $\Delta_{TC}$  is for a marginal equivalence or a  
184 conditional equivalence for a random background if absence of an interaction. Since  $E_E$   
185  $[E_C(D_{TR})] = E_C[E_E(D_{TR})] = \Delta_{TC}$ ,  $E_C(D_{TR})$  would represent an estimate of  $\Delta_{TC}$ , and an  
186 equivalence criterion for a GM trait effect could be defined implicitly by

$$187 \quad \frac{|E_C(D_{TR})|}{\sigma_g} \leq \theta_c \tag{3}$$

188 where  $\theta_c$  is a conditional equivalence criterion to be discussed in the following. This mixed  
189 model approach has been applied by FDA for individual equivalence [16] and by Vahl and Kang

190 for a distribution-wise equivalence in GM crop assessment [8]. Therefore, a conditional  
 191 equivalence is defined solely for a GM trait effect  $\Delta_{TC}$ , and a criterion  $\theta_c$  could be derived as a  
 192 function of the background variation (Fig 1).

193 Let  $E_C(D_{TR}) = (D_{TR} | D_{CR} = 0)$  denote a conditional difference with a mean  $\mu_{D_{TR}|D_{CR}=0}$  which  
 194 has been shown to be the best estimator of the trait effect based on the correlation structure  
 195 among three genotypic group means in a TCR trial [15]. Note that  $\Delta_{CR} = 0$  is a key assumption  
 196 in defining the natural variation for GM crop safety assessment. Thus,  $\mu_{D_{TR}|D_{CR}=0}$  and  $\Delta_{TC}$  are  
 197 interchangeable in terms of the parameter value (or the equivalence criterion), but a statistic for  
 198  $\mu_{D_{TR}|D_{CR}=0}$  would be applied for an equivalence testing.

199 Parallel comparisons of criteria (1), (2), and (3) could be made using mean-squares of  
 200 expected differences i.e.  $[E(\cdot)]^2$  to demonstrate differences in the statistical hypotheses.

$$\begin{array}{ll}
 \left\{ \begin{array}{l}
 \Delta_{TC}^2 < \theta_c^2 \sigma_g^2 \\
 \Delta_{TC}^2 < \theta_{VK}^2 \sigma_g^2 - 2\Delta_{TC}\Delta_{CR} - \Delta_{CR}^2 \\
 \Delta_{TC}^2 < \theta_{EFSA}^2 \sigma_{D_{TR}}^2 - 2\Delta_{TC}\Delta_{CR} - \Delta_{CR}^2
 \end{array} \right. & \begin{array}{l}
 \text{Conditional Criterion} \\
 \text{Criterion of Vahl and Kang} \\
 \text{EFSA Criterion}
 \end{array}
 \end{array}$$

202 First, by criteria of EFSA and Vahl and Kang, equivalence of a trait effect  $\Delta_{TC}$  would be  
 203 largely determined by the background effect  $\Delta_{CR}$ , not only the magnitude but also its direction.  
 204 Opposite signs of  $\Delta_{TC}$  and  $\Delta_{CR}$  would be much more likely to be concluded as equivalent than  
 205 those with the same sign do. In addition, the probability thresholds for  $\theta_{EFSA}$  and  $\theta_{VK}$  assume  $\Delta_{TC}$   
 206 = 0, not a requirement of the principle of substantial equivalence. In contrast, the conditional  
 207 equivalence criterion does not assume  $\Delta_{TC} = 0$ , but  $\Delta_{TC} = 0$  is expected to provide a maximum  
 208 chance of concluding equivalence regardless of the sign and magnitude of  $\Delta_{CR}$  for a given  
 209 control.

210 Second, a conditional equivalence standard could be derived as  $\theta_c = \sqrt{\theta_{VK}^2 - 1}$  e.g.  $\theta_c =$   
211  $\sqrt{z_{0,975}^2 - 1} \approx 1.69$  of which an interpretation could be provided as follows. For a GM test with a  
212 trait effect  $|\Delta_{TC}| < 1.69\sigma_g$ , when averaging over the background effect, the GM test crop would  
213 be within the 95% confidence interval of a reference. Therefore, the conditional criterion  $\theta_c\sigma_g$  is  
214 for a trait effect and defined by the range of reference variation thus follows the OECD  
215 guidelines [1,2,3].

216 Third, EFSA equivalence criterion is a much loosely defined criterion as a function of the  
217 experimental design (i.e. numbers replicates and sites and total number of references) with  $\theta_{EFSA}$   
218  $> \theta_{VK}$  and  $\sigma_{D_{TR}}^2 > \sigma_g^2$ , which compromises the efficacy of detecting an unintended effect if  
219 presents as pointed out by Vahl and Kang [8, p23], and tends to encourage a trial with lower  
220 number of reference and consequently lead to an arbitrary conclusion of equivalence as  
221 concerned by Ward et al. [10].

222 In summary, a conditional equivalence criterion independent of the background was derived  
223 in this section in the scale of the reference variation, thus called a variation-scaled criterion.  
224 However, while criteria of EFSA and Vahl and Kang are all variation-scaled criteria, if applied  
225 as a one-fits-all criterion, certain problems are inevitable. Firstly, even though EFSA classifies  
226 those cases with zero estimate of  $\sigma_g$  as “Equivalence Not Concluded”, an arbitrary conclusion is  
227 expected as  $\sigma_g$  becomes less than certain threshold (relative to the residual variation) due to a  
228 large proportion of close to zero criterion. A second problem is that, with a criterion defined by a  
229 95% confidence limit, false negative (i.e. non-equivalence by chance) is expected to be at least  
230 5% for each endpoint and would be much higher due to the proof-of-equivalence. While a  
231 comprehensive assessment requires a totality of evidence, optional criteria become necessary.

232

## 233 **Alternative criteria in a comprehensive assessment**

### 234 **An empirical mean-scaled criterion when $\sigma_g$ is low**

235 Alternative criteria are discussed in this section when the reference variation is too low for a  
236 variation-scaled criterion. When  $\sigma_g^2$  is low, references in a TCR trial become similar to each  
237 other including the control. Consequently, the equivalence of a GM crop may become the same  
238 as the bioequivalence of a generic drug to a brand-named reference in pharmaceutical industry in  
239 terms of the comparison between the test and the control and the absence of references.

240 The 80-125% rule has long been adopted in pharmaceutical industry for two drugs being  
241 “similar to such a degree that their effects, with respect to both efficacy and safety, will  
242 essentially be the same” [20,21]. This standard is also recommended for GM crop equivalence  
243 assessment in this research. That is, for endpoints with low  $\sigma_g$ , a conditional equivalence would  
244 be defined in a mean-scale by

$$245 \quad \delta_c = \frac{\Delta_{TC}}{\mu_R} \quad (4)$$

246 Under the 80-125% rule, standards were differentiated between  $\Delta_{TC} < 0$  or  $\Delta_{TC} > 0$ . For  
247 simplicity  $\delta_c = 0.25$  is applied in this research, and under a log-transformation as recommended  
248 by FDA, the criterion becomes  $\Delta_{TC} = \pm \log(1 + \delta_c) = \pm \log(1.25)$ .

249 While the variation-scaled standard  $\theta_c = 1.69$  is based on the concept of equivalence under  
250 natural variation with a history-of-safe-use, the mean-scaled standard  $\delta_c = 0.25$  is empirical.  
251 Two standards appear to be independent in theory, but in practice they are highly correlated as

252 will be shown in the following maize grain composition example. Let  $CV_g = \sigma_g / \mu_R$  denote a  
253 coefficient of genetic variation among references in the original scale of a TCR trial data. Two  
254 equivalence standards would be equal, i.e.  $1.69\sigma_g = 0.25\mu_R$ , at  $CV_g = 14.8\%$ . When a log-  
255 transformation is applied, a log-normal distribution of  $y = \log(x)$  is assumed and two standards  
256 become the same in a log-scale, i.e.  $1.69\sigma_{gy} = \log(1.25)$ , at  $CV_g = 13.3\%$  using  $\sigma_{gy}^2 = \log$   
257  $(CV_g^2 + 1)$ ,  $\sigma_{gy}^2$  as the reference variance in the log-scale. As will be shown in the example,  $CV_g$   
258  $= 13.3\sim 14.8\%$  are near the center of the maize grain composition data, and two standards  $1.69$   
259  $\sigma_g$  and  $0.25\mu_R$  are in fact largely overlapped due to a narrow range of  $CV_g$  and a wide separation  
260 of means across analytes.

261

## 262 **Optional criteria for multiple comparisons**

263 Equivalence criteria of EFSA and Vahl and Kang in the previous section did not apply a  
264 whole range of reference variation, and with a 95% confidence limit a minimum 5% false  
265 negative is expected even with no trait effect and could be much higher due to the proof-of-  
266 equivalence (as shown in the following example). The same is true for a conditional equivalence.  
267 Therefore, an optional criterion  $\theta_c = \sqrt{z_{0.995}^2 - 1} \approx 2.38$  corresponding to a 99% confidence  
268 limit is recommended to control the number of false negative.

269 For a use of whole range of “natural variation” in a proof-of-equivalence, OECD provided  
270 summary of some historic data including mean and range of maize and soybean compositions  
271 [22,23]. In the meantime, EFSA adopted an intuitive evaluation using box plots of the test, the  
272 control and references for analytes failed to conclude equivalence by the equivalence testing.

273 However, these approaches were unable to separate the true (genetic ) “unintended effect” of a  
274 GM trait from those due to environments. In contrast,  $\theta_c = 2.38$  considers only genetic variation  
275 and provides a statistically interpretable standard of equivalence.

276 In addition,  $\delta_c = 0.5$  is also recommended as an optional criterion for endpoints with low  
277 reference variation following the practice of pharmaceutical industry for high variant endpoints  
278 [24].

279

## 280 **A data-driven procedure for criterion selection**

281 The following diagram describes the proof-of-equivalence approach as requested by EFSA,  
282 similar to those in pharmaceutical industry [16,24,25]. The diagram can be applied on a mean of  
283 a GM test or a difference between a GM test and references.

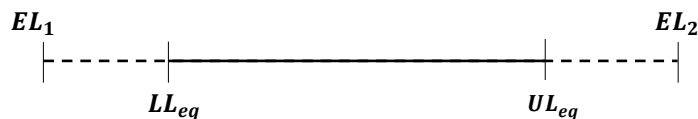

284

285 where  $EL_1$  and  $EL_2$  are lower and upper limits of an equivalence criterion,  $(LL_{eq}, UL_{eq})$  is a  
286 (confidence) interval containing critical values of the estimated mean or difference for  
287 concluding equivalence. The dash lines consist of the estimated mean or difference failed to be  
288 concluded as equivalent, called the burden of proof-of-equivalence, due to the margin-of-error in  
289 comparisons with  $EL_1$  and  $EL_2$  at the designated significance level.

290 Assume a TCR trial with eight sites each of four replicates per site/treatment currently  
291 requested by EFSA and generally accepted by most international regulatory agencies. The trait

292 effect is best estimated by a conditional difference with a mean  $\mu_{D_{TC}|D_{CR}=0} = \Delta_{TC} + \frac{\sigma_{D_{TC}}^2}{2\sigma_{D_{CR}}^2}\Delta_{CR}$  and  
 293 a variance  $\sigma_{D_{TR}|D_{CR}}^2 = \sigma_{D_{TC}}^2 \left(1 - \frac{\sigma_{D_{TC}}^2}{4\sigma_{D_{CR}}^2}\right)$  as derived in Jiang et al. [15]. For simplicity, no genotype  
 294 by environmental interactions were assumed. With a given  $\sigma_g:\sigma_e$  (or a given  $\sigma_g$  at  $\sigma_e = 1$ ), a  
 295 normal approximation was applied in the following for an asymptotic equivalence analysis using  
 296 an interval  $(LL_{eq}, UL_{eq})$  as functions of  $(EL_1, EL_2)$  defined by equations (3) and (4).

297 Let  $EL_c = EL_2 = -EL_1$  for a GM trait effect. In this section, a threshold of  $\sigma_g:\sigma_e$  for  
 298 alternating  $EL_c = 1.69\sigma_g$  and  $0.25\mu_R$ , a key question in criterion selection, is investigated.  
 299 Obviously, no equivalence could be concluded even for  $\Delta_{TC} = 0$  with  $EL_c = 1.69\sigma_g$  if  $\sigma_g:\sigma_e$  is  
 300 close to zero, and the threshold of  $\sigma_g:\sigma_e$  should be large enough for  $EL_c = 1.69\sigma_g$  to provide an  
 301 80% power of equivalence under a regulatory requested design. Fig 2 presents numerical results  
 302 of an asymptotic equivalence analysis (ignored the variation in estimating  $\sigma_g$ ). Variation settings  
 303  $\sigma_g:\sigma_e = (0 \sim 3)$  in the left plot and the residual coefficient of variation  $CV_e = (0 \sim 30\%)$  in the  
 304 right plot is based on the maize grain composition example in the following section. In the left  
 305 plot, a grid search was performed over  $\Delta_{TC} = (0 \sim 2.38\sigma_g)$  for each value of  $\sigma_g:\sigma_e$ , the  
 306 maximum trait effect for 80% power of equivalence was obtained with  $EL_c = 1.69\sigma_g$  and  $2.38\sigma_g$   
 307 as functions of  $\sigma_g:\sigma_e$ . Similarly, in the right plot is for  $EL_c = 0.25\mu_R$  and  $0.5\mu_R$  as functions of  
 308  $CV_e$ .

309

310 **Fig 2. Asymptotic maximum GM trait effects for 80% power of equivalence under EFSA**  
 311 **requested design.** Left plot: Asymptotic maximum GM trait effects with  $EL_c = 1.69\sigma_g$  and  $2.38$

312  $\sigma_g$  as functions of  $\sigma_g:\sigma_e$ ; Right plot: Asymptotic maximum GM trait effects with  $EL_c = 0.25\mu_R$   
 313 and  $0.5\mu_R$  as functions of residual coefficient of variation  $CV_e$ .

314

315 Results in Fig 2 indicate that, in general, an 80% power of equivalence requires a trait effect  
 316  $\Delta_{TC}$  substantially less than  $EL_c$  due to the proof-of-equivalence. Asymptotically, a threshold  $\sigma_g:$   
 317  $\sigma_e = 1.0$  could be applied for alternating  $EL_c = 1.69\sigma_g$  and  $0.25\mu_R$  (Fig 2). When  $\sigma_g:\sigma_e \geq 1.0$ ,  
 318 the maximum trait effect for equivalence is about  $1.4\sigma_g$  for  $EL_c = 1.69\sigma_g$  and  $2.1\sigma_g$  for  $EL_c =$   
 319  $2.38\sigma_g$ . When  $\sigma_g:\sigma_e < 1.0$ , even a negligible trait effect might not have enough power to  
 320 conclude equivalence by either criterion. By  $EL_c = 0.25\mu_R$ , the maximum trait effect for  
 321 equivalence is about  $0.15\mu_R$  when  $CV_e = 15\%$ . Note that Fig 2 did not include the variation in  
 322 estimating  $\sigma_g$  which should be a function of the number of references and, when considered, the  
 323 estimated maximum trait effect in Fig 2 could be substantially lower.

324 Results in Fig 2 demonstrate no existence of a one-fits-all criterion under practical ranges of  
 325  $\sigma_g:\sigma_e$  and  $CV_e$ . Therefore, the following set of conditional equivalence criteria was proposed  
 326 with a three-step procedure for criterion selection.

$$327 \quad EL_c = \begin{cases} EL_{c,0.95} = \begin{cases} 1.69\sigma_g & \text{when } \sigma_g:\sigma_e \geq 1 \\ 0.25\mu_R & \text{when } \sigma_g:\sigma_e < 1 \end{cases} \\ EL_{c,0.99} = \begin{cases} 2.38\sigma_g & \text{when } \sigma_g:\sigma_e \geq 1 \\ 0.5\mu_R & \text{when } \sigma_g:\sigma_e < 1 \end{cases} \end{cases} \quad (5)$$

328 Firstly,  $EL_{c,0.95} = 1.69\sigma_g$  is applied as the primary criterion whenever a reasonable variation  $\sigma_g$   
 329 is available, i.e.  $\sigma_g:\sigma_e \geq 1$ . Secondly, an alternative  $EL_{c,0.95} = 0.25\mu_R$  is used for  $\sigma_g:\sigma_e < 1$ .

330 Thirdly,  $EL_{c,0.99}$  is optional for endpoints failed to show equivalence with  $EL_{c,0.95}$  expectedly

331 only for a small proportion of endpoints say 5 to 10% or less.



332 In practice, the procedure (5) depends on estimates of  $\sigma_g$ ,  $\mu_R$ , and  $\sigma_g:\sigma_e$  and variations of  
333 these estimates will be a function of the experimental design.

334

## 335 **Application to a maize grain composition example**

336 Maize grain composition data in Jiang et al. [15], originally applied by EFSA for method  
337 demonstration, were reanalyzed with and without the log transformation. At first, reference  
338 means and variations were estimated from 13 references for each analyte, and paired estimates  
339 across all 53 analytes for  $EL_c = (1.69\sigma_g, 0.25\mu_R)$  without transformation and  $EL_c = (1.69\sigma_g,$   
340  $\log(1.25))$  with transformation were plotted (Fig 3). In the left plot with no transformation, a  
341 strong linear correlation can be observed between estimates of  $\sigma_g$  and  $\mu_R$  (with an estimated  $r^2$   
342  $= 0.9644$  in the log-scale). The observed  $CV_g (= \sigma_g/\mu_R)$  is highly consistent within a range  
343  $(0 \sim 25.2\%)$  and a mean 10.2% across a wide range of  $\mu_R$ . The observed  $CV_e$  has a mean 7.2%  
344 and a range  $(0.64 \sim 28.2\%)$ . In the right plot with the log transformation,  $EL_c = 1.69\sigma_g$  indeed  
345 tends to be independent of the mean. The mean estimate of  $EL_c = 1.69\sigma_g$  is 0.17, slightly lower  
346 than the line  $EL_c = \log(1.25) \approx 0.22$  in the plot.

347

348 **Fig 3. EFSA example: Estimated equivalence criteria  $EL_c = 1.69\sigma_g$  (markers) and  $0.25\mu_R$**   
349 **(line) across 53 analytes.** Left plot: Without transformation; Right plot: With log  
350 transformation.

351

352 Results from Fig 3 have at least two implications. Firstly, high comparability between  
 353 equivalence criteria  $EL_c = (1.69\sigma_g, 0.25\mu_R)$  strongly supports the equivalence evaluation of a  
 354 GM trait effect as a similarity measurement for a whole range of the reference variation. While  
 355 the concept of substantial equivalence is generally understood as comparing a GM crop with the  
 356 reference variation, a mean-scaled criterion in the original unit is a natural alternative when  $\sigma_g$  is  
 357 small and lack of a good estimate. Secondly,  $EL_c = 1.69\sigma_g$  on average appears to be more  
 358 conservative than  $EL_c = 0.25\mu_R$ , an empirical support for  $EL_c = 1.69\sigma_g$  in terms of mean percent  
 359 difference.

360 Table 1 summarizes the estimate of  $\mu_{D_{TC}|D_{CR}=0}$  in scales of  $\sigma_g$  and  $\mu_R$  (i.e. the same scale as  
 361 the criterion) and  $\sigma_{D_{TC}|D_{CR}}$  (i.e. the t value of a conditional difference test by results of EFSA  
 362 model 1 and model 2). Values in bold follow the procedure (5). Though only two analytes with  
 363 zero estimate for  $\sigma_g$ , 9 and 10 analytes are estimated as  $\sigma_g:\sigma_e < 1$  when no transformation or  
 364 transformation was applied.

365

366 **Table 1. Summary of estimates of  $\mu_{D_{TC}|D_{CR}=0}$  in ratios to  $\sigma_g$ ,  $\mu_R$ , and  $\sigma_{D_{TC}|D_{CR}}$  (results**  
 367 **following the procedure (5) marked as bold) and comparisons of three criteria with**  
 368 **difference  $D = D_{TR}$  for EFSA and Vahl and Kang (VK) methods, and  $D = \hat{\mu}_{D_{TC}|D_{CR}=0}$  for**  
 369 **conditional equivalence (CD).**

| $\sigma_g:\sigma_e$ | Mean estimate and range of $ \mu_{D_{TC} D_{CR}=0} $ in ratios to |            |         |                          | # Analytes (with $ D  > EL$ ) |    |    |
|---------------------|-------------------------------------------------------------------|------------|---------|--------------------------|-------------------------------|----|----|
|                     | # Analyte                                                         | $\sigma_g$ | $\mu_R$ | $\sigma_{D_{TC} D_{CR}}$ | EFSA                          | VK | CD |
| In original unit    |                                                                   |            |         |                          |                               |    |    |

|                         |    |                               |                               |                 |    |    |   |
|-------------------------|----|-------------------------------|-------------------------------|-----------------|----|----|---|
| $\geq 1$                | 44 | <b><u>0.34(0.00~1.12)</u></b> | 0.04(0.00~0.13)               | 1.48(0.01~5.25) | 2  | 3  | 0 |
| $< 1$                   | 9  | 1.35(0.59~2.12)*              | <b><u>0.09(0.02~0.19)</u></b> | 1.90(0.93~3.80) | 1* | 2* | 0 |
| With log transformation |    |                               |                               |                 |    |    |   |
| $\geq 1$                | 43 | <b><u>0.37(0.01~1.24)</u></b> | 0.04(0.00~0.14)               | 1.61(0.03~6.47) | 2  | 5  | 0 |
| $< 1$                   | 10 | 1.02(0.17~1.81)*              | <b><u>0.09(0.02~0.22)</u></b> | 1.69(0.35~3.79) | 1* | 1* | 0 |

370 \*: Two analytes with zero estimate of  $\sigma_g$  are not included.

371  
372 While large t values for estimates of  $\mu_{D_{TC}|D_{CR}=0}$  in the ratio to  $\sigma_{D_{TC}|D_{CR}}$  are evidence of non-  
373 zero trait differences, results in bold demonstrate the good performance of the procedure (5). For  
374 example, for those analytes with  $\sigma_g:\sigma_e < 1$  and  $EL_c = 0.25\mu_R$  without transformation or  $EL_c =$   
375  $\log(1.25)$  with transformation, estimates of  $\mu_{D_{TC}|D_{CR}=0}$  are all well within the limit (i.e. 0.25) in  
376 the scale of  $\mu_R$ , but several of them would have exceeded the limit (i.e. 1.69) if  $EL_c = 1.69\sigma_g$   
377 was applied. Results are highly consistent with and without transformation.

378 The last three columns of Table 1 summarize comparisons of the estimated difference with  
379 three criteria: EFSA, VK for Vahl and Kang, and CD for the conditional equivalence. With a  
380 proof-of-equivalence, an estimated difference exceeding  $EL$  would automatically lead to a non-  
381 equivalence conclusion.  $|D_{TR}| > EL$  were observed for both criteria of EFSA and VK. Three  
382 cases of  $|D_{TR}| > EL$  for EFSA criterion represents almost exactly a 5% of non-equivalence by  
383 chance, 2.6 (i.e. 5% of 51) in expectation which simply suggests no evidence of GM trait effects.  
384 These results are the same as EFSA original analysis with the transformation, where three  
385 analytes were classified as “Non-Equivalence More Likely Than Not” or “Non-Equivalence”.  
386 Yet a total of nine analytes (i.e. 17% of 53) failed to conclude equivalence including two with  
387 zero estimate of  $\sigma_g$ , much higher than the nominal 5% level due to the proof-of-equivalence.

388 However, for the conditional criteria no  $|\mu_{D_{TC}|D_{CR}=0}| > EL_c$  was observed. Note that although no  
389 trait effect exceeds  $EL_{c,0.95}$  in Table 1,  $EL_{c,0.99}$  might still be necessary in a formal testing due to  
390 the proof-of-equivalence.

391 In summary, despite of a formal statistical testing yet to be developed, simple comparisons in  
392 the example demonstrate obvious advantages of the conditional equivalence criteria proposed in  
393 this investigation over those of EFSA and Vahl and Kang in a comprehensive equivalence  
394 assessment.

395

## 396 **Discussion**

397 Under OECD guidelines GM crop safety assessment is characterized by the comparative  
398 approach on a GM crop of known (control) genotypic background to conventional references  
399 with a history-of-safe-use. The equivalence testing method prescribed by EFSA assesses  
400 differences between the GM variety and a group of commercial reference varieties. These  
401 differences, as discussed by Jiang et al. [9], may be driven by a trait effect, a known control  
402 background effect, or both. The EFSA equivalence criterion consists of only the background  
403 variation, and three direct consequences are worth noting. First, the EFSA criterion is entirely for  
404 the random background effect, contradicting with the principle focusing on “unintended effect”  
405 of a GM trait. Second, the EFSA criterion becomes degenerate when the reference variation is  
406 low and estimated as zero or close to zero, a common case in composition studies. Third, it is the  
407 inability to control the false negative rate, i.e. substantially higher than the target 5% level as  
408 defined by criteria of EFSA [6] or Vahl and Kang [8] due to the proof-of-equivalence even in the  
409 absence of a true GM trait effect.

410 A set of conditional equivalence criteria under the same assumptions as those of EFSA and  
411 Vahl and Kang are derived in this manuscript. However, the new criteria are for a GM trait effect  
412  $\Delta_{TC}$ , which is independent of the genotypic background of a given control and thus  
413 fundamentally different from those of EFSA and others.

414 The approach using the reference variation  $\sigma_g$  as a scale in this manuscript, if available,  
415 follows the principle of substantial equivalence of OECD guideline that “any observed  
416 differences should be assessed in the context of the range of natural variations” [2]. When the  
417 reference variation  $\sigma_g$  is small, an alternative criterion was proposed to apply the scale of the  
418 reference mean  $\mu_R$  with the procedure (5). The parallel nature of the mean-scaled and the  
419 variation-scaled criteria lies in the definition of equivalence to a fixed reference (with a mean  
420 percentage difference as an empirical standard) or to a group of references (with a fold of  
421 standard deviation defining the range of a history-of-safe-use). Re-analysis of the maize grain  
422 composition example originally applied by EFSA illustrate that even though only two endpoints  
423 have  $\sigma_g$  estimated as zero, low values of  $\sigma_g$  relative to the residual are common (about 20% in  
424 the example by the threshold  $\sigma_g:\sigma_e < 1$ ). In these cases, a mean-scaled criterion as defined in (5)  
425 should be considered as a natural alternative to a variation-scaled criterion, which is strongly  
426 supported by the close correlation between the mean and variation in the example (Fig 3) and  
427 commonly observed in biological literature (e.g. the log-transformation suggested by EFSA and  
428 FDA in pharmaceutical studies).

429 Another type of criterion in the literature for endpoints with low values of  $\sigma_g:\sigma_e$  could be  
430 labeled as “phenotypic equivalence” due to including residual variation  $\sigma_e$  (and other  
431 environmental variations) as part of the “natural variation” in defining equivalence. One example  
432 is the distribution-wise equivalence proposed by Vahl and Kang [8] and applied by Van der Voet

433 et al. [26] in the analysis of five studies in which GM crops were fed to rats. Another example is  
434 the criterion applied by Schmidt et al. [27], based on one unit of reference standard deviation, i.e.  
435  $\sqrt{\sigma_g^2 + \sigma_e^2}$  in expectation, following an example in the EFSA guideline [28]. An intuitive  
436 interpretation of the “phenotypic equivalence” would be a large proportion of overlapping  
437 between observed responses of the test and the control. However, no discussion could be found  
438 on the level of “unintended effect” of a GM trait in the unit of  $\sigma_e$ , either in terms of the  
439 regulatory policy or a biological interpretation. In addition, practical implications of these criteria  
440 would depend on the type of the study (e.g. the applicable sample size) and the characteristic of  
441 the endpoint (e.g. magnitudes of  $CV_g$  and  $CV_e$ ).

442 In their guideline, EFSA also proposed a simulation approach for evaluating equivalence by  
443 an empirical distribution of the number of significant outcomes in the difference testing between  
444 two independent references. Regardless of the residual variation, the absolute mean difference  
445 between two references is  $\sqrt{2}\sigma_g$  and a 95% confidence limit would be approximately  $2.8\sigma_g$   
446 under normality. From this perspective,  $EL_c = 1.69\sigma_g$  and  $2.38\sigma_g$  in (5) would be considered as  
447 conservative. Therefore, even though, under certain circumstances, some assumptions would be  
448 more plausible than others, the comparative assessment of GM crops should be a comprehensive  
449 approach with false negatives under control.

450 A false negative in an equivalence testing is in many ways similar to the false positive in a  
451 difference test. In the maize grain composition example, the EFSA criterion demonstrated an  
452 almost exact 5% of the analytes with observed differences greater than the equivalence limit (i.e.  
453 3/51 or 5.9%) (Table 1). However, due to the proof-of-equivalence approach, a much higher  
454 proportion of analytes (i.e. 9/53 or 17%) failed to conclude equivalence by the EFSA method [6].

455 However, all analytes in the example are within the conditional limits  $EL_{c,0.95} = 1.69\sigma_g$  or  
456  $0.25\mu_R$ . In addition, a step-wise procedure with optional criteria  $EL_{c,0.99} = 2.38\sigma_g$  or  $0.5\mu_R$  was  
457 proposed in this investigation for endpoints failed to conclude equivalence at  $EL_{c,0.95}$ . In contrast  
458 to use the box plots of EFSA or historic data [22,23,29], criteria  $EL_{c,0.99}$  consist of no  
459 environmental effects, thus are true criteria of “unintended effect” due to multiple comparisons.  
460 References in the current TCR trial though limited in number often may be a more reliable  
461 source of information due to difficulties in estimating the genotypic variation among references  
462 from historic data.

463 With the criteria developed here, an immediate further research subject would be statistical  
464 methods of conditional equivalence testing applying these criteria. Because these criteria must be  
465 estimated from the reference data and the variation of the estimation must be taken into account  
466 especially when the number of references is limited. The variation of the estimated criterion  
467 would be compounded with those of the trait effect, not accounted for in the EFSA equivalence  
468 testing, which partially contributed to its poor performance.

469

## 470 **Acknowledgments**

471 We thank Duška Stojšin and John Vicini for providing constructive feedback on the manuscript.

472

## 473 **References**

- 474 1. OECD, Safety evaluation of foods derived by modern biotechnology: Concepts and  
475 principles. 1993, Organisation for economic co-operation and development: Paris,  
476 France.
- 477 2. Codex Alimentarius, Guideline for the conduct of food safety assessment of foods  
478 derived from recombinant-DNA plants. 2003, Codex Alimentarius Commission, Joint  
479 FAO/WHO Food Standards Programme, Food and Agriculture Organization of the  
480 United Nations: Rome, Italy.
- 481 3. Codex Alimentarius, Foods derived from modern biotechnology. 2009, Codex  
482 Alimentarius Commission, Joint FAO/WHO Food Standards Programme, Food and  
483 Agriculture Organization of the United Nations: Rome, Italy.
- 484 4. FAO. GM Food Safety Assessment: Tools for trainers. Food and Agriculture  
485 Organization of the United Nations Rome, 2008. ISBN 978-92-5-105978-4.
- 486 5. EFSA, Commission Implementing Regulation (EU) No 503/2013 of 3 April 2013 on .  
487 for authorisation of genetically modified food and feed in accordance with Regulation  
488 (EC) No 1829/2003 of the European Parliament and of the Council and amending  
489 Commission Regulations (EC) No 641/2004 and (EC) No 1981/2006 Text with EEA  
490 relevance. 2013, European Food Safety Authority: Parma, Italy.
- 491 6. EFSA, Scientific opinion on statistical considerations for the safety evaluation of  
492 GMOs. EFSA Journal, 2010. 8: p. 1-59.
- 493 7. Kang Q and Vahl CI. Statistical analysis in the safety evaluation of genetically-modified  
494 crops: Equivalence tests. Crop Science, 2014. 54: p. 2183-2200.
- 495 8. Vahl CI and Kang Q. Equivalence criteria for the safety evaluation of a genetically  
496 modified crop: A statistical perspective. The Journal of Agricultural Science, 2015.  
497 154(03): p. 383-406.
- 498 9 Jiang C, Meng C, Schapaugh A. Comparative analysis of genetically-modified crops:  
499 Part 1. Conditional difference testing with a given genetic background. PLoS ONE,  
500 2019. 14(1): e0210747. <https://doi.org/10.1371/journal.pone.0210747>
- 501 10. van der Voet H, Perry JN, Amzal B, and Paoletti C. A statistical assessment of  
502 differences and equivalences between genetically modified and reference plant varieties.  
503 BMC Biotechnology, 2011. 11(15): p. 1-20.



- 504 11. Ward KJ, Nemeth MA, Brownie C, Hong B, Herman RA, and Oberdoerfer R.  
505 Comments on the paper "A statistical assessment of difference and equivalences  
506 between genetically modified and reference plant varieties" by van der Voet et al. 2011.  
507 BMC Biotechnology, 2012. 12(13): p. 1-7.
- 508 12. Fernandez A and Paoletti C. Unintended Effects in Genetically Modified Food/Feed  
509 Safety: A Way Forward. Trends in Biotechnology, 2018. 36(9): p. 872-875.
- 510 13. Simó C, Ibáñez C, Valdés A, Cifuentes A. and García-Cañas V. Metabolomics of  
511 Genetically Modified Crops. Int. J. Mol. Sci. 2014. 15: p. 18941-18966;  
512 Doi:10.3390/ijms151018941
- 513 14. Herman RA, Fast BJ, Scherer PN, Brune AM, de Cerqueira DT, Schafer BW, et al.  
514 Stacking transgenic event DAS-O1507-1 alters Herman RA less than traditional  
515 breeding. Plant Biotechnology Journal, 2017. 15(10): p. 1264-1272.
- 516 15. Herman RA, Huang E, Fast B, and Walker C. EFSA Genetically Engineered Crop  
517 Composition Equivalence Approach: Performance and Consistency. Journal of  
518 Agricultural and Food Chemistry, 2019. 67(14): p. 4080-4088.
- 519 16. FDA, Guidance for industry: Statistical approaches to establishing bioequivalence. 2001,  
520 U.S. Department of Health and Human Services, Food and Drug Administration, Center  
521 for Drug Evaluation and Research.
- 522 17. Prado JR, Segers G, Voelker T, Carson D, Dobert R, Phillips J, et al. Genetically  
523 Engineered Crops: From Idea to Product. Annu. Rev. Plant Biol. 2014. 65: p. 769–90.
- 524 18. Venkatesh TV, Cook K, Liu B, Perez T, Willse A, Tichich R, et al. Compositional  
525 differences between near-isogenic GM and conventional maize hybrids are associated  
526 with backcrossing practices in conventional breeding. Plant Biotechnology Journal  
527 2015. 13: p. 200-210.
- 528 19. Horak MJ, Rosenbaum EW, Woodrum CL, Martens AB, Mery RF, Cothren JT, et al.  
529 Characterization of Roundup Ready Flex Cotton, ‘MON 88913’, for use in ecological  
530 risk assessment: Evaluation of seed germination, vegetative and reproductive growth,  
531 and ecological interactions. Crop Sci 2007. 47: p. 268-77;  
532 <http://dx.doi.org/10.2135/cropsci2006.02.0063>
- 533 20. Schall R and Endrenyi L. Bioequivalence: tried and tested. Cardiovasc J Afr 2010.  
534 21(2): p. 69-70.

- 535 21. Kumar SA, Sanjita D. A Review article on Bioavailability and Bioequivalence Studies.  
536 International Journal of PharmTech Research 2013. 5: p. 1711-1721.
- 537 22. OECD Environmental Health and Safety Publication Series on the Safety of Novel  
538 Foods and Feeds. No. 6 Consensus Document on Compositional Considerations for New  
539 Varieties of Maize (*Zea Mays*): Key Food and Feed Nutrients, Anti-nutrients and  
540 Secondary Plant Metabolites. 2002. OECD Environment Directorate, Paris.
- 541 23. OECD Environmental Health and Safety Publication Series on the Safety of Novel  
542 Foods and Feeds. No. 25 Revised Consensus Document on Compositional  
543 Considerations for New Varieties of SOYBEAN [*Glycine max* (L.) Merr]: Key Food  
544 and Feed Nutrients, Anti-nutrients, Toxicants, and Allergens. 2012. OECD Environment  
545 Directorate, Paris.
- 546 24. Davit BM, Chen ML, Correr DP, Haidar SH, Kim S, Lee CH, et al. Implementation of a  
547 Reference-Scaled Average Bioequivalence Approach for Highly Variable Genetic Drug  
548 Products by the US Food and Drug Administration. The AAPS Journal 2012. 14(4): p.  
549 915-924.
- 550 25. Hsu J, Hwang JTG, Liu HK and Ruberg SJ. Confidence intervals associated with tests  
551 for bioequivalence. Biometrika 1994. 81: p. 103–114.
- 552 26. van der Voet H, Goedhart PW, Schmidt K. Equivalence testing using existing reference  
553 data: An example with genetically modified and conventional crops in animal feeding  
554 studies. Food and Chemical Toxicology 2017. 109: p. 472-485.
- 555 27. Schmidt K, Schmidtke J, Schmidt P, Kohl C, Wilhelm R, Schiemann J, et al. Variability  
556 of control data and relevance of observed group differences in five oral toxicity studies  
557 with genetically modified maize MON810 in rats. Arch Toxicol 2017. 91: p. 1977–2006.
- 558 28. EFSA Guidance on conducting repeated-dose 90-day oral toxicity study in rodents on  
559 whole food/feed. EFSA J 2011. 9: p. 2438.
- 560 29. Herman RA, Scherer PN, Phillips AM, Storer NP, Krieger M. Safety composition levels  
561 of transgenic crops assessed via a clinical medicine model. Biotechnol. J. 2010. 5(2): p.  
562 172-182.

563

564

## 565 **Supporting information**

566 **S1 Fig. Graphical illustration of EFSA and conditional equivalence criteria.** EFSA

567 equivalence criterion is defined primarily by a (random) control background effect and has no  
568 specification of a GM trait effect, and a conditional equivalence criterion is defined solely for a  
569 GM trait effect with a given control.

570

571 **S2 Fig. Asymptotic maximum GM trait effects for 80% power of equivalence under EFSA**

572 **requested design.** Left plot: Maximum GM trait effects with  $EL_c = 1.69\sigma_g$  and  $2.38\sigma_g$  as  
573 functions of  $\sigma_g:\sigma_e$ ; Right plot: Maximum GM trait effects with  $EL_c = 0.25\mu_R$  and  $0.5\mu_R$  as  
574 functions of residual coefficient of variation  $CV_e$ .

575

576 **S3 Fig. EFSA example: Estimated equivalence criteria of  $EL_c = 1.69\sigma_g$  (markers) and**

577  **$0.25\mu_R$  (line) across 53 analytes.** Left plot: Without transformation; Right plot: With log  
578 transformation.

579

580

→ GM Trait Effect  
(Test – Control)

## EFSA Equivalence Limits on Background Effect

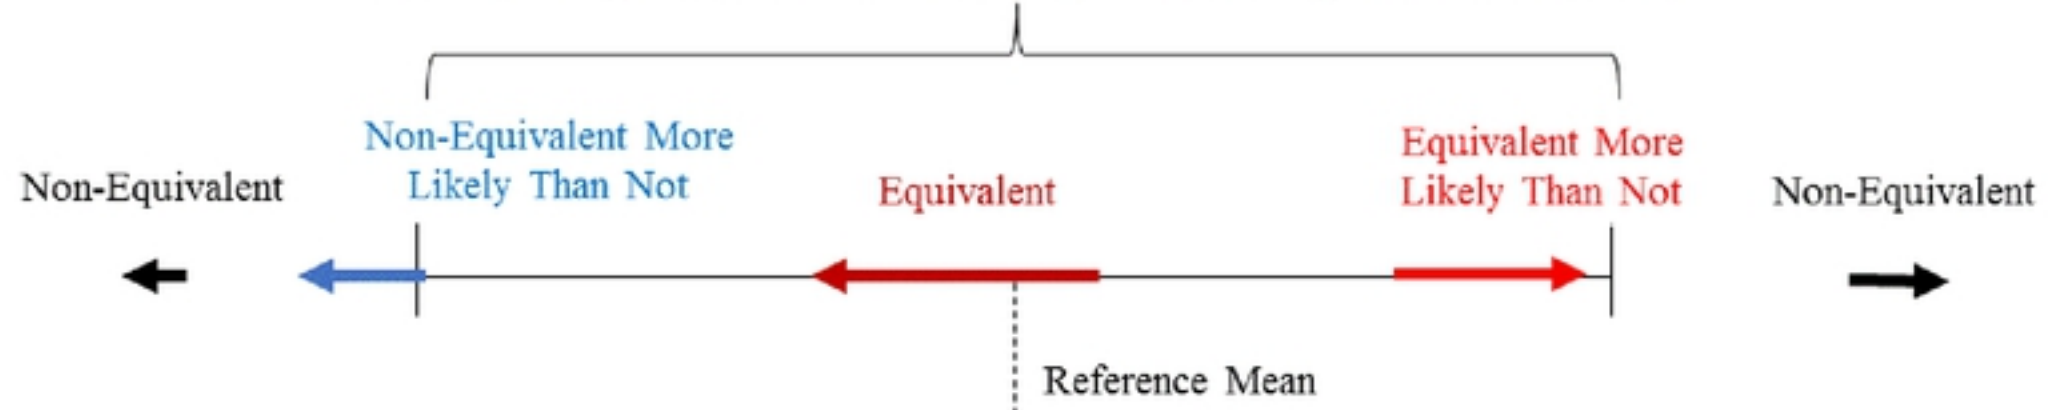

## Conditional Equivalence Limits on GM Trait Effect

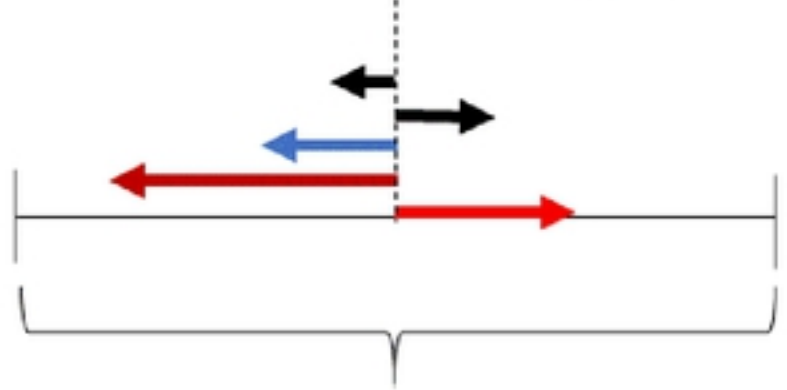

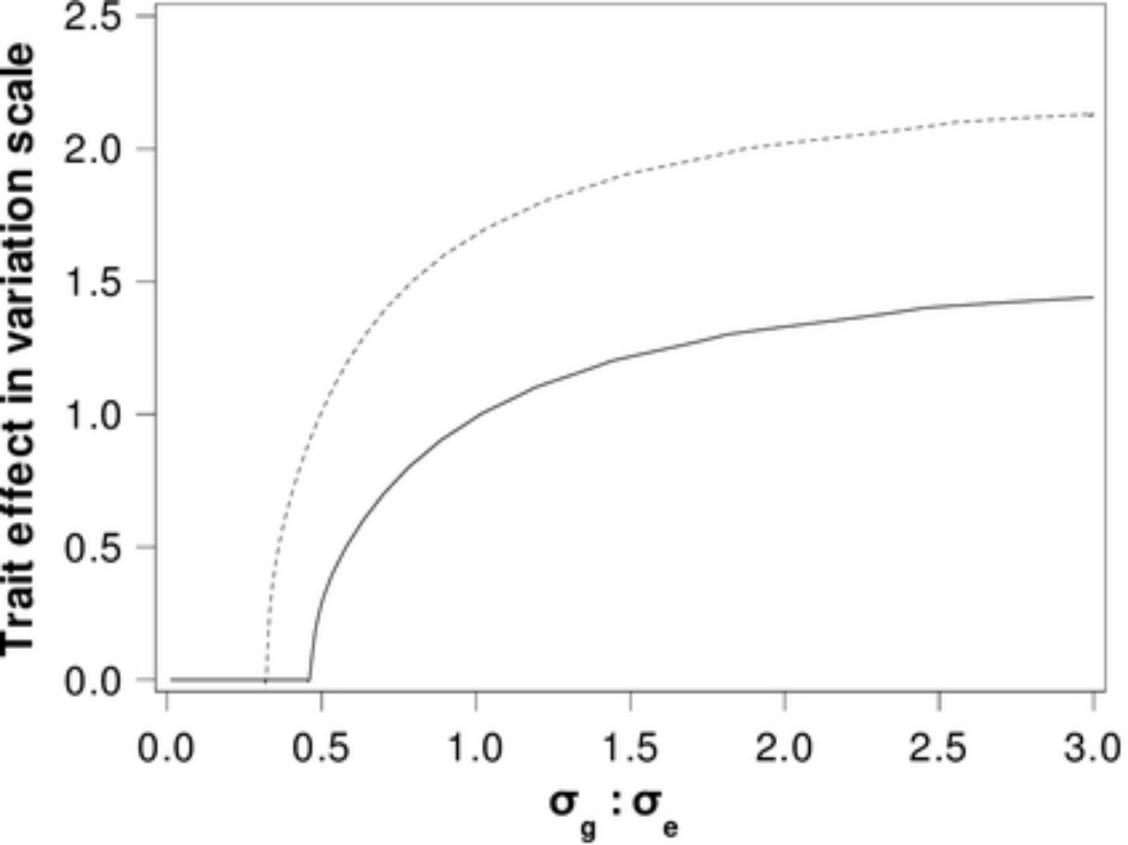

Cover Letter

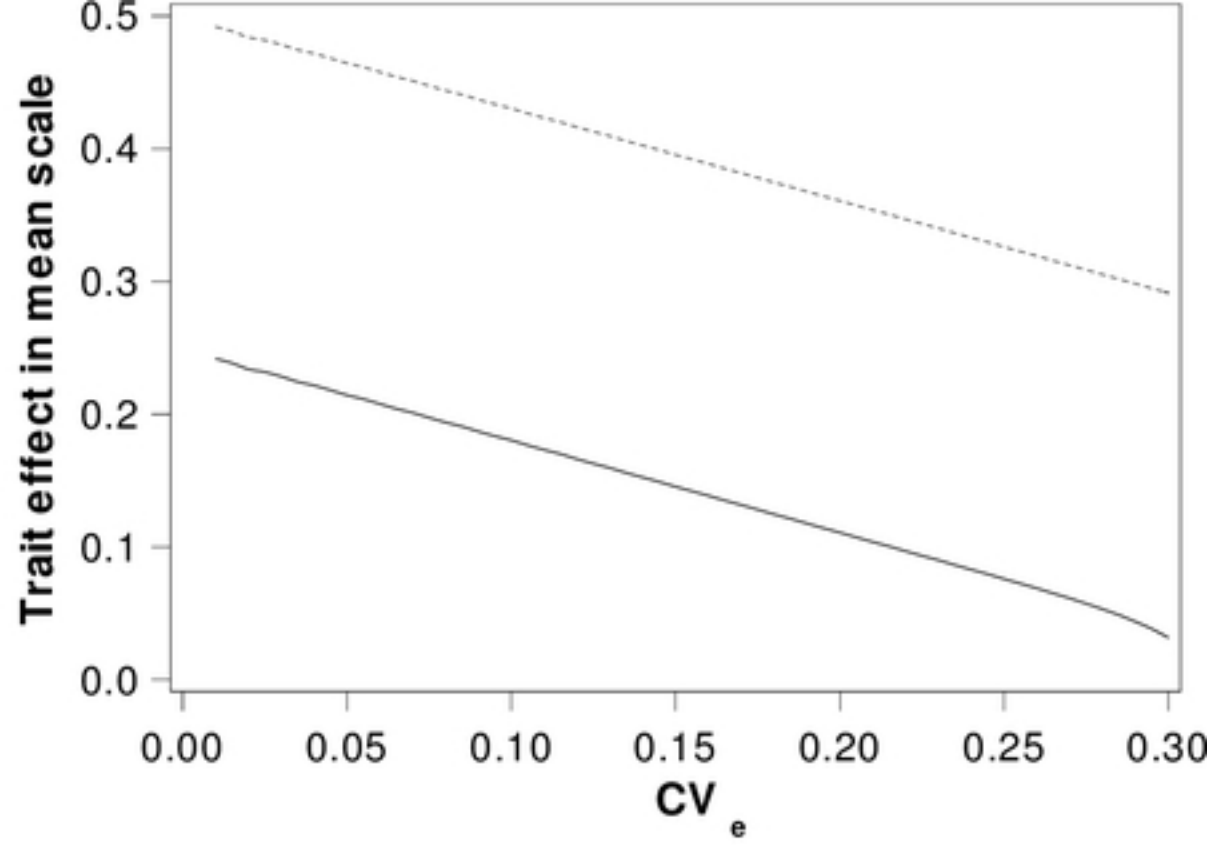

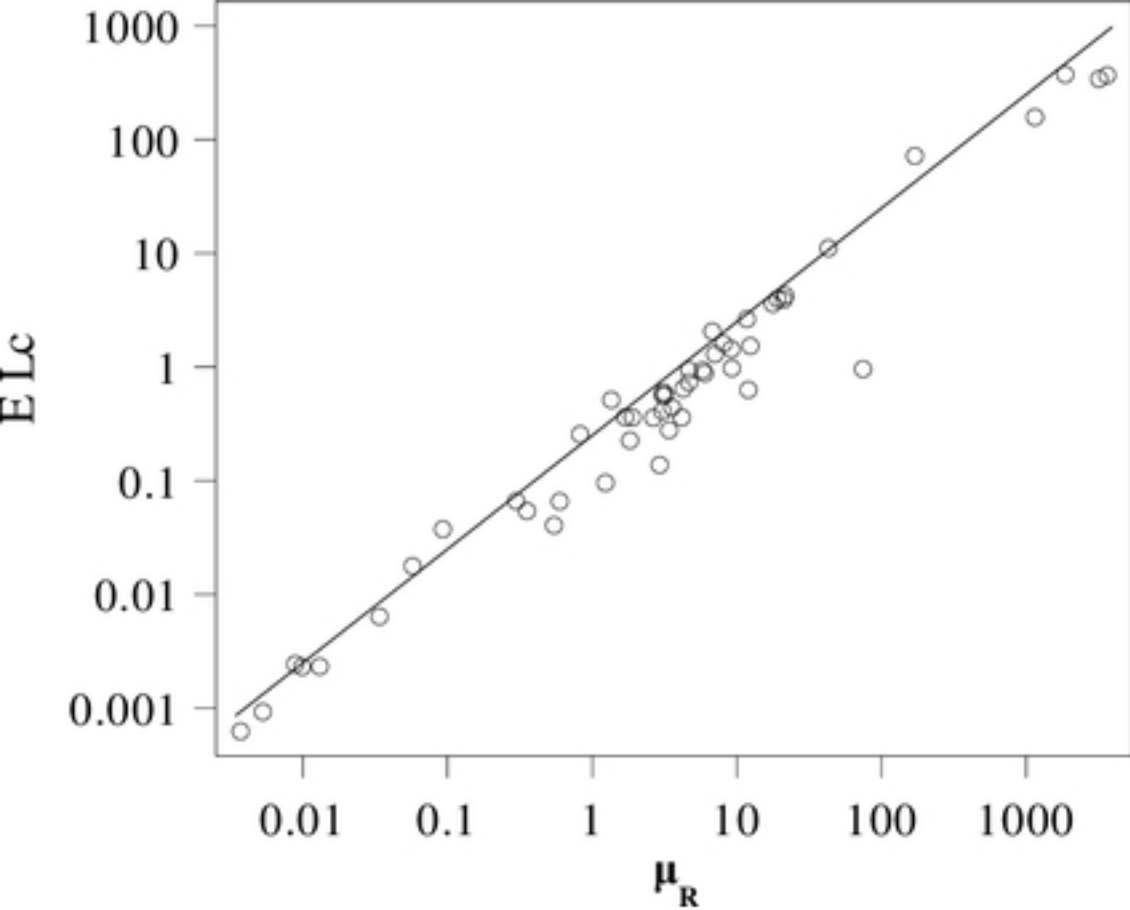

Cover Letter

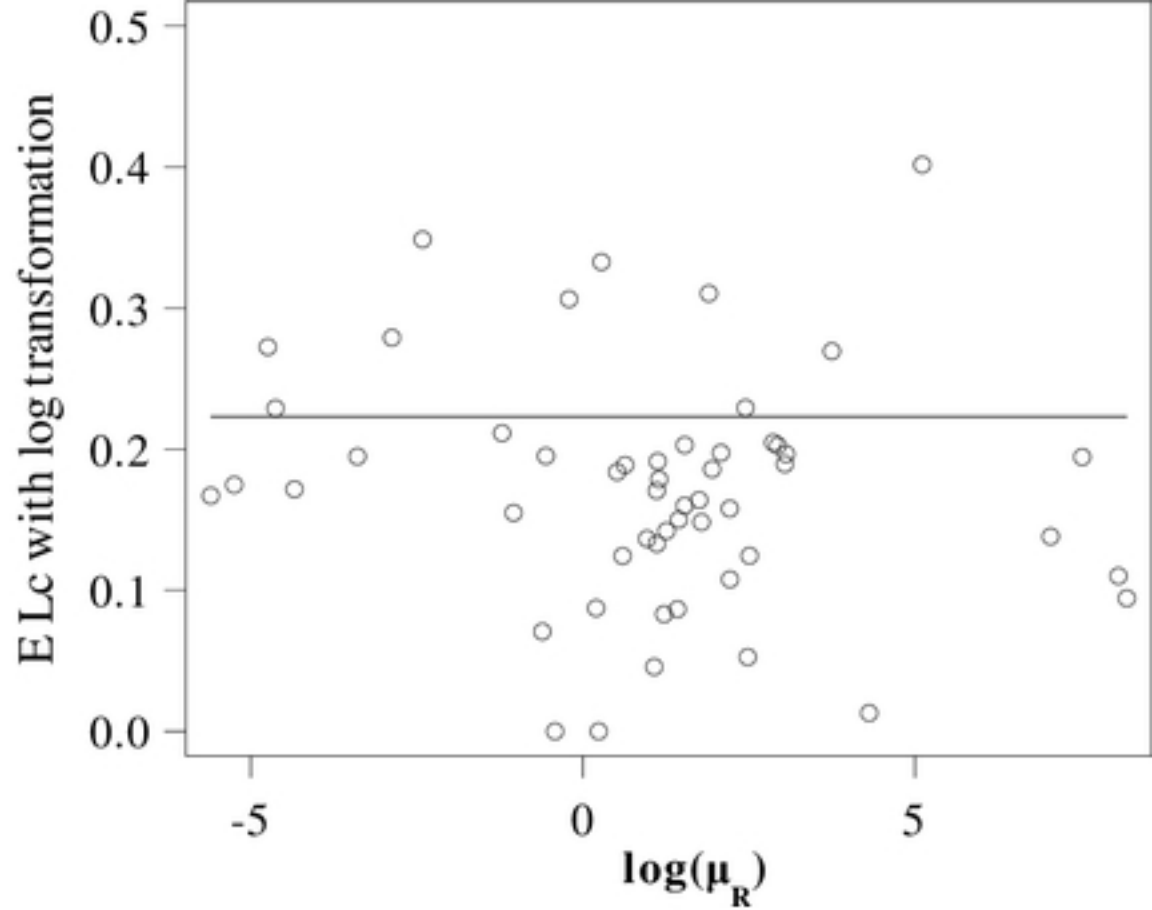

Source: https://biorxiv.org/content/10.1101/2021.02.19.431950v1.full.pdf
